# Supplementary material
Source: Royal Society of Chemistry journal article supplement (doi:10.1039/d6cy00663a)
Supplement: d6cy00663a1.pdf [file d6cy00663a1.pdf]

## SUPPORTING INFORMATION

### **Redox-Responsive Multimetal Phosphides for Reverse Water–Gas Shift: Does High Entropy Improve Catalytic Activity?**

Cheng-Chia Kuo,<sup>a</sup> Ting-Hao Liu,<sup>a</sup> Po-Yang Peng,<sup>b</sup> Ying-Rui Lu,<sup>b</sup> Chi-Liang Chen,<sup>b</sup> Wei-Hsiang Huang,<sup>b</sup> Chih-Wen Pao,<sup>b</sup> and Yu-Chuan Lin<sup>a,c,d\*</sup>

<sup>a</sup> Department of Chemical Engineering, National Cheng Kung University, Tainan 70101, Taiwan

<sup>b</sup> National Synchrotron Radiation Research Center, Hsinchu 30076, Taiwan

<sup>c</sup> Center for Resilience and Intelligence on Sustainable Energy Research (RiSER), National Cheng Kung University, Tainan 70101, Taiwan

<sup>d</sup> Program on Smart and Sustainable Manufacturing, Academy of Innovative Semiconductor and Sustainable Manufacturing, National Cheng Kung University, Tainan 70101, Taiwan

Corresponding author's email: [yclin768@mail.ncku.edu.tw](mailto:yclin768@mail.ncku.edu.tw)

**Table S1.** Relative compositions of surface species determined by deconvolution of the corresponding XPS spectra.

| Sample                                     | State | Cr  | Mn  | Fe  | Co  | Ni  | P        |         |
|--------------------------------------------|-------|-----|-----|-----|-----|-----|----------|---------|
|                                            |       | (%) | (%) | (%) | (%) | (%) | P–Me (%) | P–O (%) |
| FeP <sub>x</sub> /SiO <sub>2</sub>         | +2    | -   | -   | 80  | -   | -   | 22       | 78      |
|                                            | +3    | -   | -   | 20  | -   | -   |          |         |
| CoP <sub>x</sub> /SiO <sub>2</sub>         | Co–P  | -   | -   | -   | 39  | -   | 48       | 52      |
|                                            | +2    | -   | -   | -   | 61  | -   |          |         |
| NiP <sub>x</sub> /SiO <sub>2</sub>         | Ni–P  | -   | -   | -   | -   | 43  | 41       | 59      |
|                                            | +2    | -   | -   | -   | -   | 57  |          |         |
| FeCoNiP <sub>x</sub> /SiO <sub>2</sub>     | Me–P  | -   | -   | 0   | 44  | 32  | 31       | 69      |
|                                            | +2    | -   | -   | 59  | 56  | 68  |          |         |
|                                            | +3    | -   | -   | 41  | -   | -   |          |         |
| CrMnFeCoNiP <sub>x</sub> /SiO <sub>2</sub> | Me–P  | -   | -   | 0   | 39  | 42  | 57       | 43      |
|                                            | +2    | -   | 100 | 66  | 61  | 58  |          |         |
|                                            | +3    | 100 | -   | 34  | -   | -   |          |         |

**Table S2.** Selective studies of metal phosphide-based catalysts in RWGS.

| Catalyst                                                                          | T<br>(°C) | P<br>(MPa) | Feed                                                       | GHSV<br>(L g <sub>cat</sub> <sup>-1</sup> h <sup>-1</sup> ) | X <sub>CO2</sub><br>(%) | S <sub>CO</sub><br>(%) | E <sub>a</sub><br>(kJ mol <sup>-1</sup> ) | Ref  |
|-----------------------------------------------------------------------------------|-----------|------------|------------------------------------------------------------|-------------------------------------------------------------|-------------------------|------------------------|-------------------------------------------|------|
| Ni <sub>2</sub> P/CeO <sub>2</sub>                                                | 500       | 0.1        | CO <sub>2</sub> :H <sub>2</sub> :N <sub>2</sub><br>= 1:2:2 | 150.0                                                       | 29                      | 86                     | -                                         | 1    |
| Ni <sub>12</sub> P <sub>5</sub> /Al <sub>2</sub> O <sub>3</sub>                   | 600       | 0.1        | CO <sub>2</sub> :H <sub>2</sub> =                          | 12.0                                                        | 58                      | 35                     | -                                         | 2    |
| Ni <sub>12</sub> P <sub>5</sub> /CeO <sub>2</sub> /Al <sub>2</sub> O <sub>3</sub> |           |            | 1:4                                                        |                                                             | 64                      | 54                     | -                                         |      |
| Mo-P/SiO <sub>2</sub>                                                             | 550       | 0.1        | CO <sub>2</sub> :H <sub>2</sub> =                          | 12.0                                                        | 21                      | 100                    | -                                         | 3    |
| Mo-P/Al <sub>2</sub> O <sub>3</sub>                                               |           |            | 1:4                                                        |                                                             | 26                      | 83                     | -                                         |      |
| Mo-P/CeO <sub>2</sub> /Al <sub>2</sub> O <sub>3</sub>                             |           |            |                                                            |                                                             | 25                      | 88                     | -                                         |      |
| Ni <sub>12</sub> P <sub>5</sub> /SiO <sub>2</sub>                                 | 700       | 0.1        | CO <sub>2</sub> :H <sub>2</sub> :N <sub>2</sub>            | 12.0                                                        | 62                      | 100                    | 55.0                                      | 4    |
| Ni <sub>2</sub> P/SiO <sub>2</sub>                                                |           |            | = 1:4:5                                                    |                                                             | 57                      | 100                    | 39.0                                      |      |
| NiP/SiO <sub>2</sub>                                                              |           |            |                                                            |                                                             | 19                      | 96                     | 84.0                                      |      |
| NiP <sub>2</sub> /SiO <sub>2</sub>                                                |           |            |                                                            |                                                             | 2                       | 91                     | 78.2                                      |      |
| Ni <sub>12</sub> P <sub>5</sub> /SBA-15                                           | 550       | 0.1        | CO <sub>2</sub> :H <sub>2</sub> :N <sub>2</sub>            | 43.2                                                        | 24                      | 100                    | -                                         | 5    |
| Ni <sub>12</sub> P <sub>5</sub> @SBA-15                                           |           |            | = 1:4:1                                                    |                                                             | 31                      | 100                    | -                                         |      |
| RuP (1:1)                                                                         | 400       | 0.1        | CO <sub>2</sub> :H <sub>2</sub> :N <sub>2</sub>            | 30.0                                                        | 2                       | 100                    |                                           | 6    |
| RuP (5:1)                                                                         |           |            | = 1:1:1                                                    |                                                             | 15                      | 84                     |                                           |      |
| RuP (10:1)                                                                        |           |            |                                                            |                                                             | 15                      | 62                     |                                           |      |
| FeCoNiP <sub>x</sub> /SiO <sub>2</sub>                                            | 700       | 0.1        | CO <sub>2</sub> :H <sub>2</sub> :N <sub>2</sub>            | 7.2                                                         | 51                      | 100                    | 63.4                                      | This |
| CrMnFeCoNiP <sub>x</sub><br>/SiO <sub>2</sub>                                     |           |            | =1:3:4                                                     |                                                             | 42                      | 100                    | 75.6                                      | work |

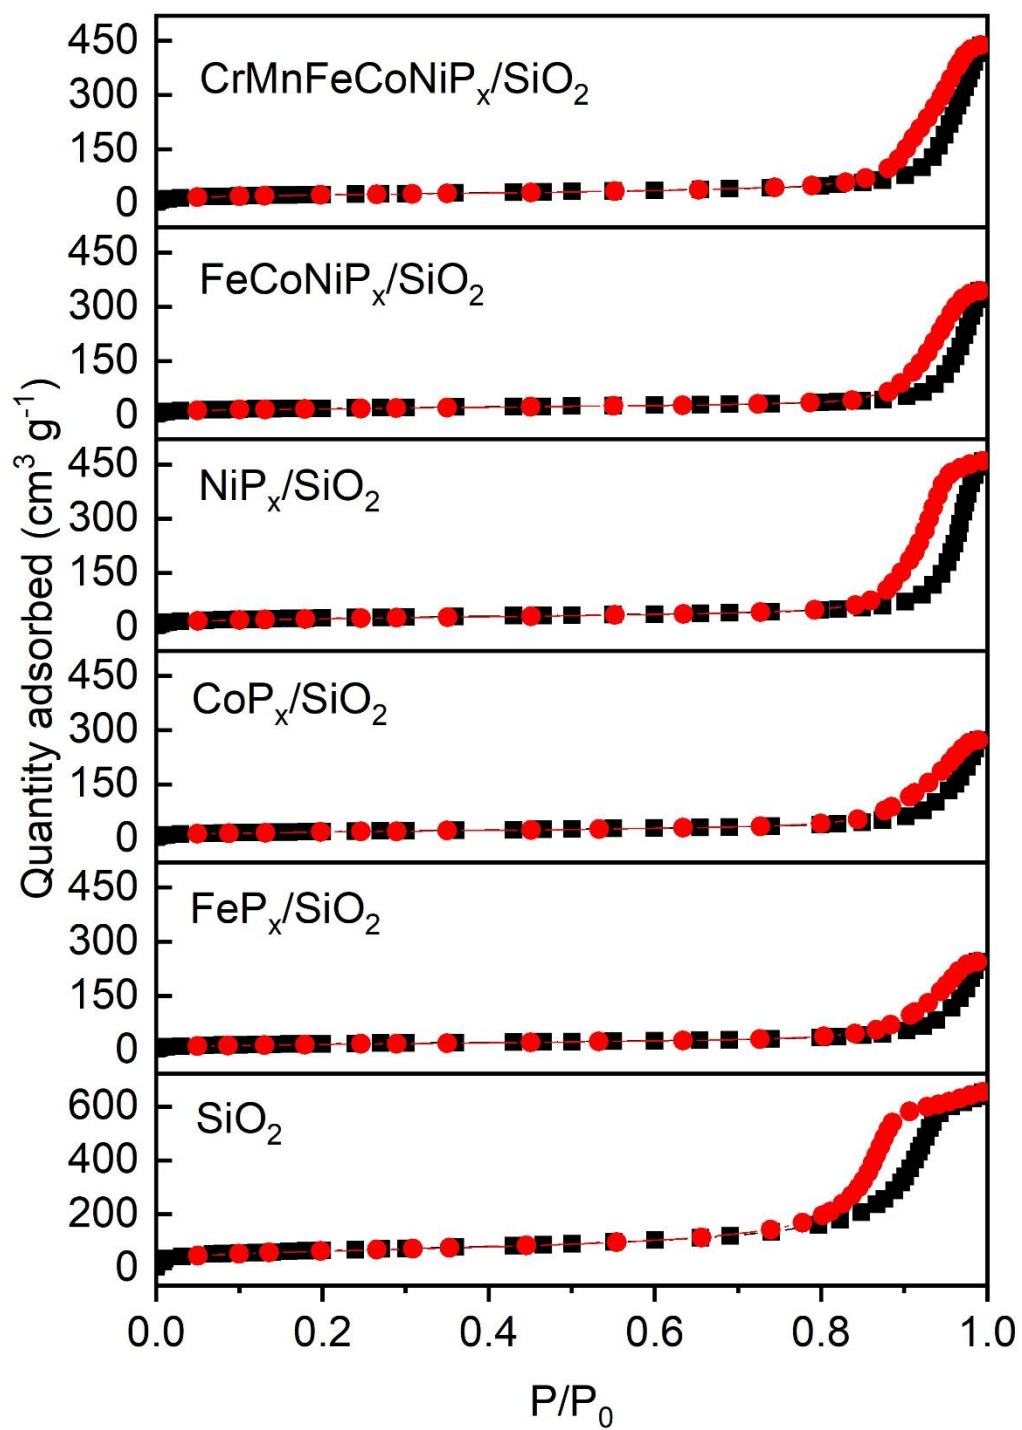

**Figure S1.** N<sub>2</sub> isotherms of tested catalysts. SiO<sub>2</sub> was also included as reference.

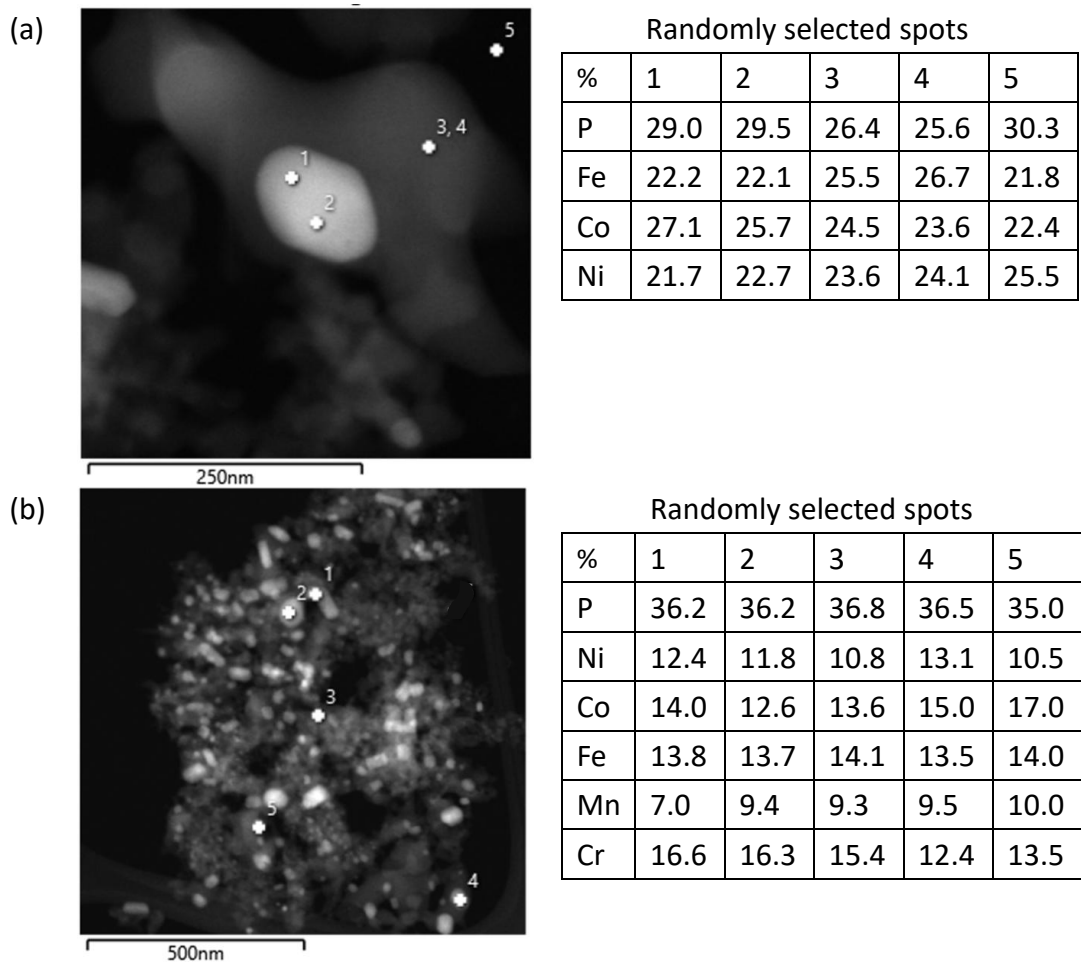

**Figure S2.** The elemental composition (atom%) of EDS mapping results by randomly selected 5 spots of (a)  $\text{FeCoNiP}_x/\text{SiO}_2$  and (b)  $\text{CrMnFeCoNiP}_x/\text{SiO}_2$ .

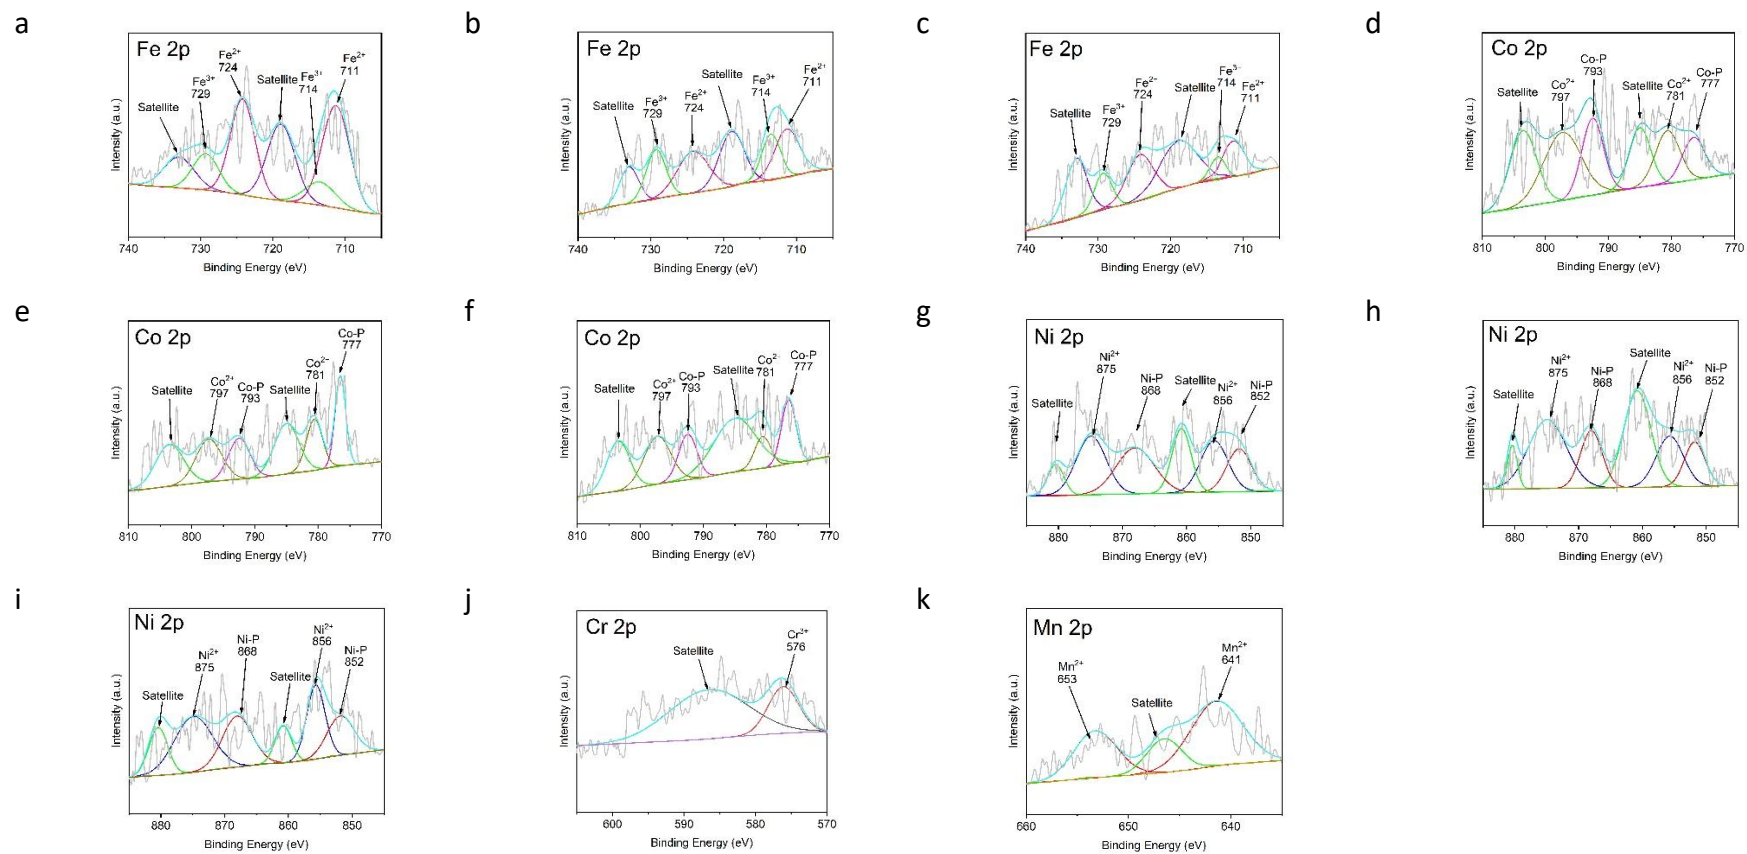

**Figure S3.** XPS spectra of Fe 2p for (a)  $\text{FeP}_x/\text{SiO}_2$ , (b)  $\text{FeCoNiP}_x/\text{SiO}_2$ , and (c)  $\text{CrMnFeCoNiP}_x/\text{SiO}_2$ ; Co 2p for (d)  $\text{CoP}_x/\text{SiO}_2$ , (e)  $\text{FeCoNiP}_x/\text{SiO}_2$ , and (f)  $\text{CrMnFeCoNiP}_x/\text{SiO}_2$ ; and Ni 2p for (g)  $\text{NiP}_x/\text{SiO}_2$ , (h)  $\text{FeCoNiP}_x/\text{SiO}_2$ , and (i)  $\text{CrMnFeCoNiP}_x/\text{SiO}_2$ ; (j) Cr and (k) Mn 2p XPS spectra of  $\text{CrMnFeCoNiP}_x/\text{SiO}_2$ .

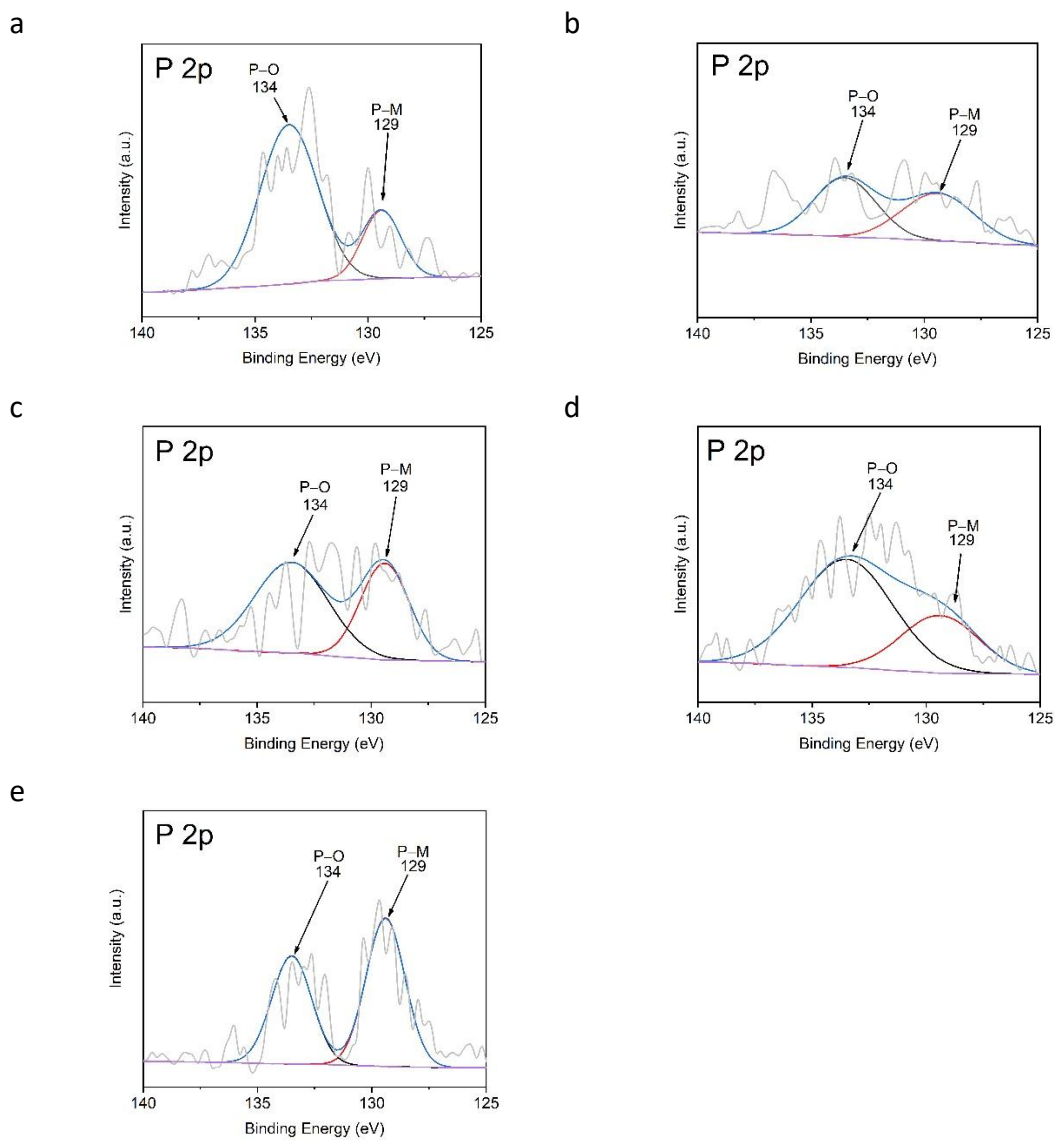

**Figure S4.** XPS spectra of P 2p for (a)  $\text{FeP}_x/\text{SiO}_2$ , (b)  $\text{CoP}_x/\text{SiO}_2$  (c),  $\text{NiP}_x/\text{SiO}_2$ , (d)  $\text{FeCoNiP}_x/\text{SiO}_2$ , and (e)  $\text{CrMnFeCoNiP}_x/\text{SiO}_2$ .

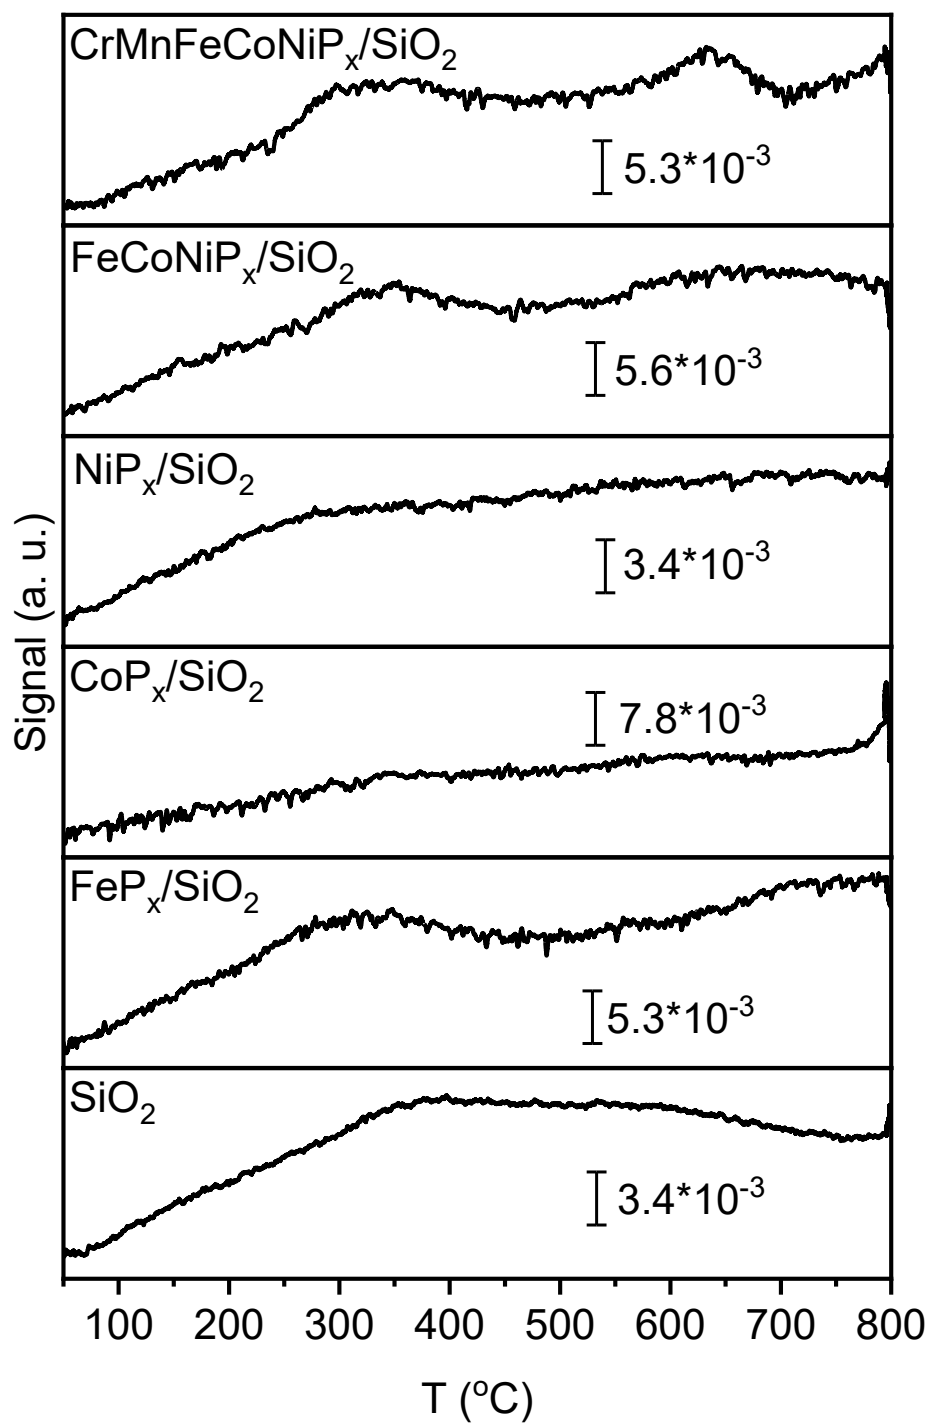

**Figure S5.** CO<sub>2</sub>-TPO profiles of tested catalysts. SiO<sub>2</sub> was also tested for comparison.

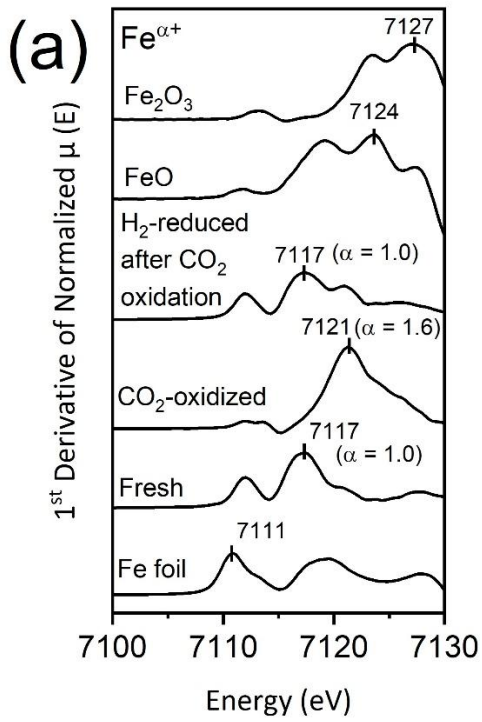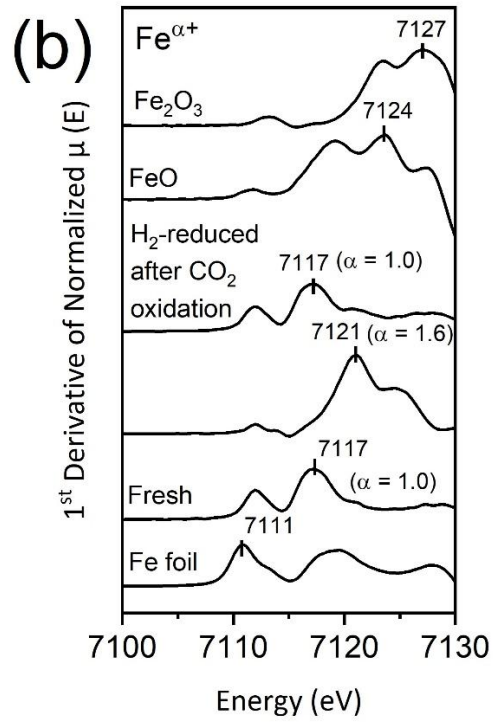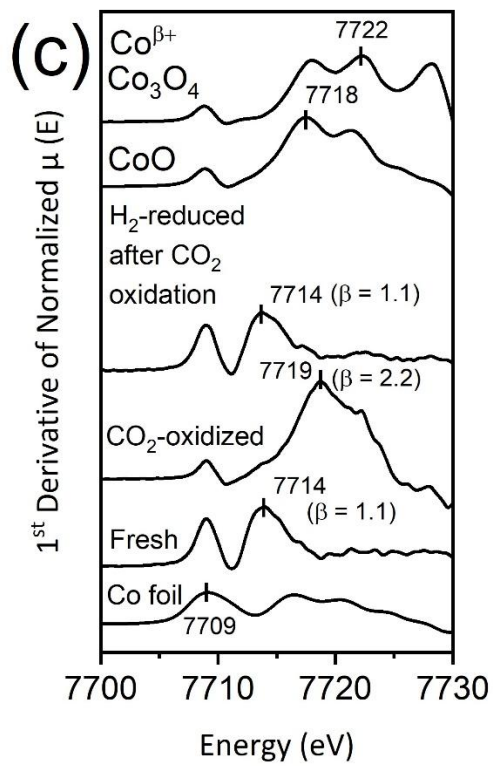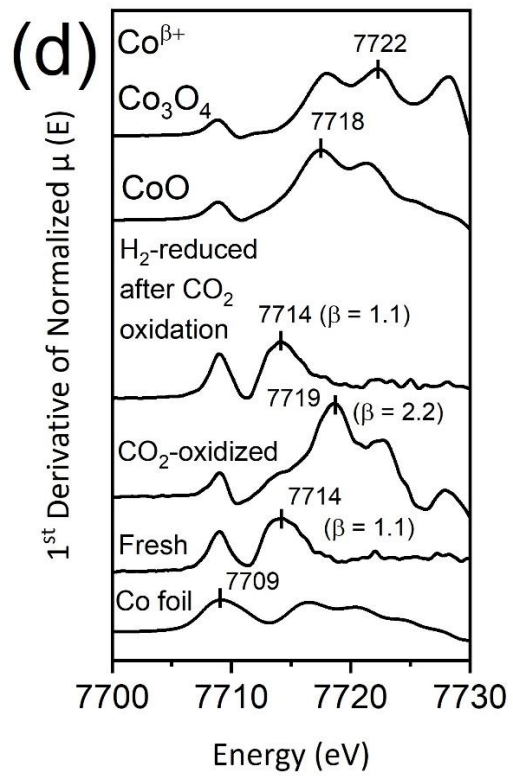

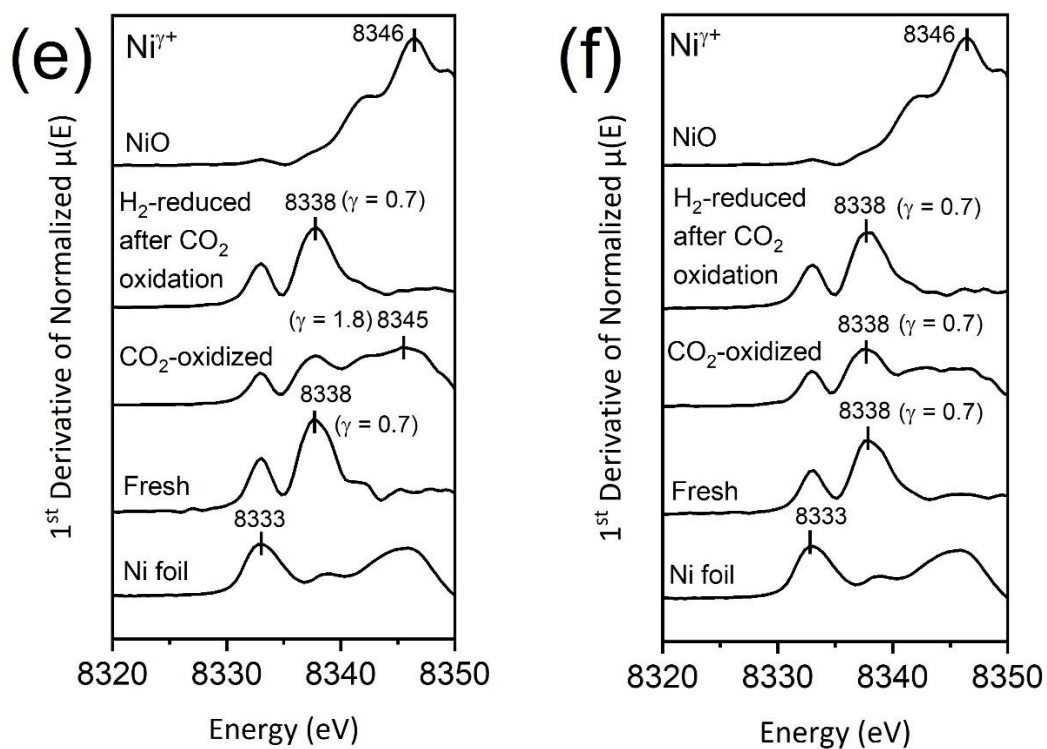

**Figure S6.** The 1<sup>st</sup> derivatives of (a, b) Fe (c, d) Co, and (e, f) Ni K-edge spectra of FeCoNiP<sub>x</sub>/SiO<sub>2</sub> and CrMnFeCoNiP<sub>x</sub>/SiO<sub>2</sub> in the forms of fresh, CO<sub>2</sub>-oxidized, and H<sub>2</sub>-reduced after CO<sub>2</sub> oxidation. Ni foil (Ni<sup>0</sup>) and NiO were included as references.

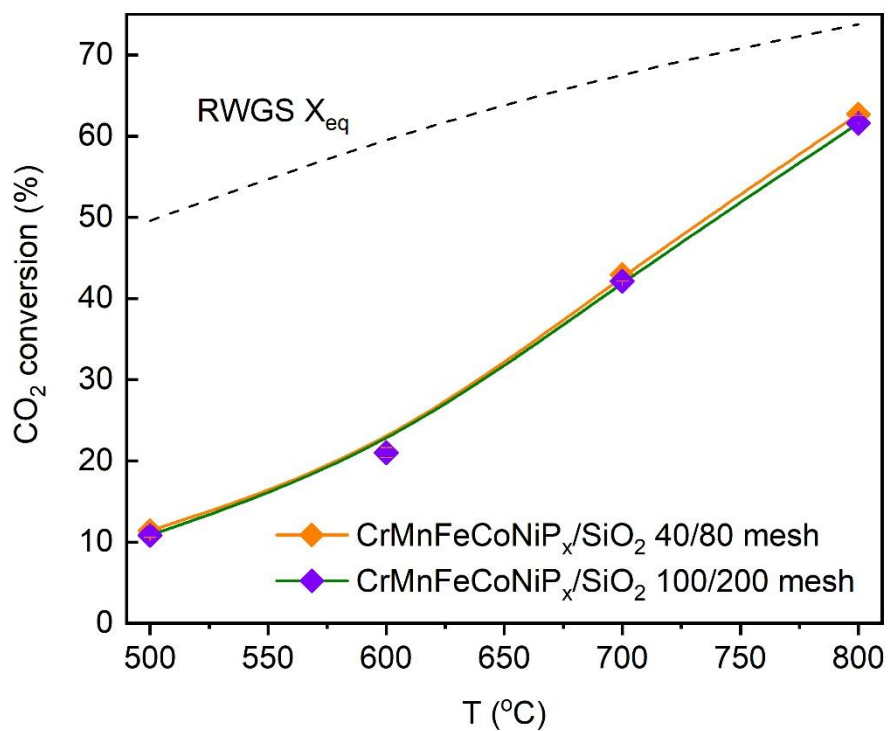

**Figure S7.** Conversions of CO<sub>2</sub> of CrMnFeCoNiP<sub>x</sub>/SiO<sub>2</sub> by using 40-80 mesh and 100-200 mesh particle sizes (All catalysts had CO selectivity >99.9%). Reaction condition: P = 0.1 MPa, H<sub>2</sub>/CO<sub>2</sub> = 3, and GHSV = 7200 mL g<sub>cat</sub><sup>-1</sup> h<sup>-1</sup>.

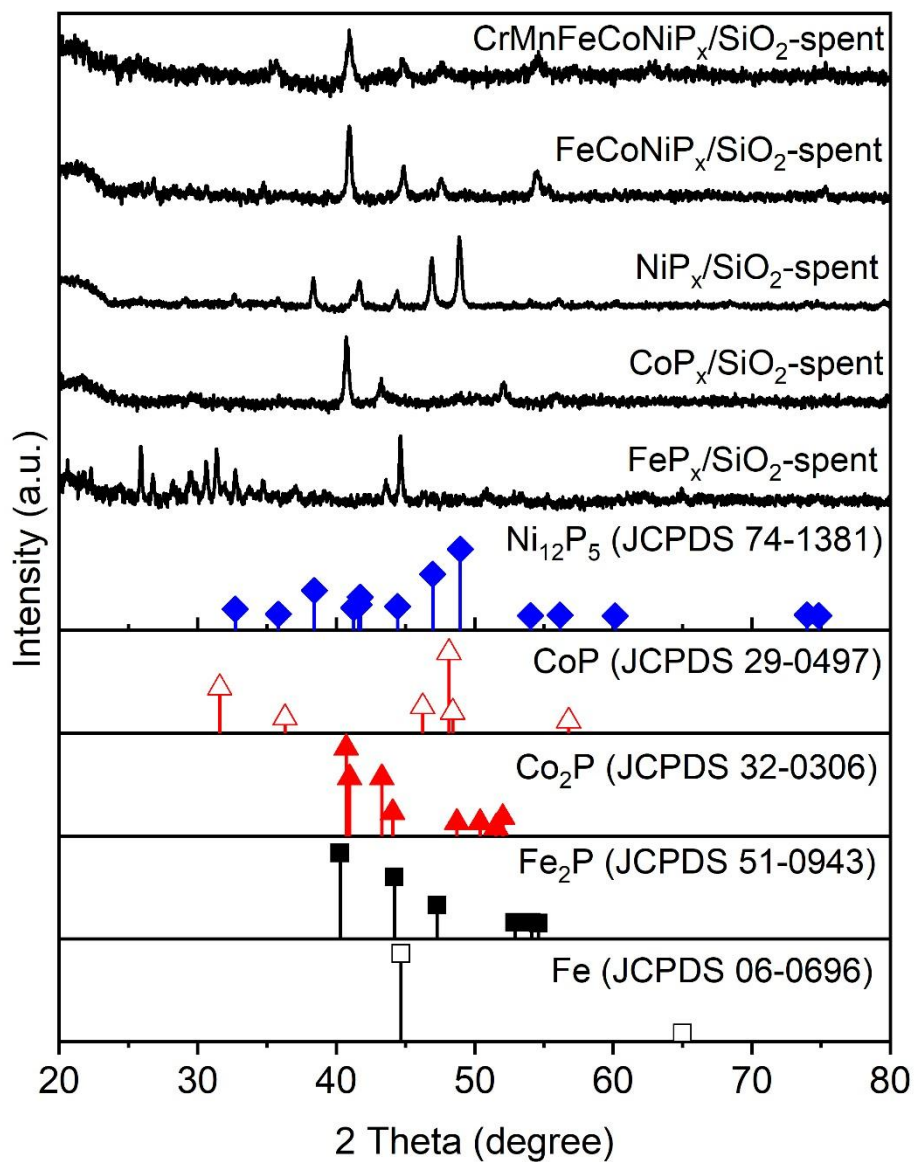

**Figure S8.** XRD patterns of the post-reaction silica-supported metal phosphide catalysts.

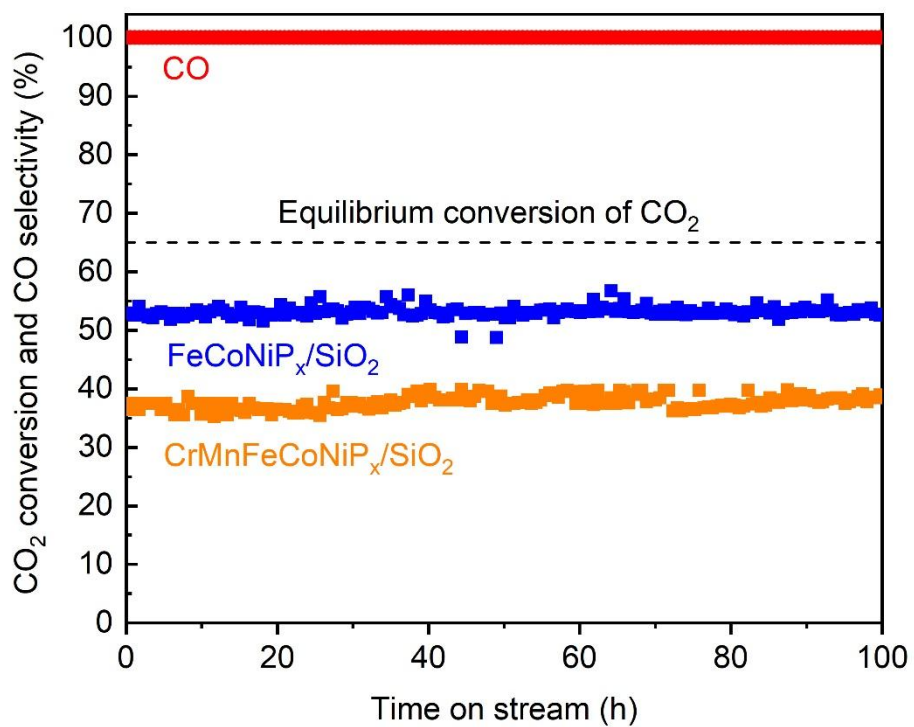

**Figure S9.** 100-h durability test for FeCoNiP<sub>x</sub>/SiO<sub>2</sub> and CrMnFeCoNiP<sub>x</sub>/SiO<sub>2</sub> at 700 °C. Reaction condition: P = 0.1 MPa, H<sub>2</sub>/CO<sub>2</sub> = 3, and GHSV = 7200 mL g<sub>cat</sub><sup>-1</sup> h<sup>-1</sup>.

## References

1. S. Cui, X. Wang, L. Wang and X. Zheng, *Dalton Trans.*, 2021, **50**, 5978-5987.
2. Q. Zhang, L. Pastor-Pérez, J. J. Villora-Pico, M. Joyce, A. Sepúlveda-Escribano, M. S. Duyar and T. R. Reina, *Fuel*, 2022, **323**, 124301.
3. Q. Zhang, M. Bown, L. Pastor-Pérez, M. S. Duyar and T. R. Reina, *Ind. Eng. Chem. Res.*, 2022, **61**, 12857-12865.
4. G. Hameed, A. Goksu, L.-P. Merkouri, A. Penkova, T. R. Reina, S. C. Ruiz and M. S. Duyar, *J. CO2 Utiliz.*, 2023, **77**, 102606.
5. S. Bao, T. Liu, H. Fu, Z. Xu, X. Qu, S. Zheng and D. Zhu, *ACS Appl. Mater. Interfaces*, 2023, **15**, 45949-45959.
6. G. Ji, C. Li, B. Fan, G. Wang, Z. Sun, M. Jiang, L. Ma, L. Yan and Y. Ding, *ACS Catal.*, 2024, **14**, 1595-1607.
